# Supplementary material
Source: Springer Nature journal article supplement (https://www.springermedizin.de/resource/supplementary/12885_2010_2738_MOESM7_ESM.pdf/9461838)

A. Once-lifetime screening with *careHPV@0.5pg/ml* at age 35 years

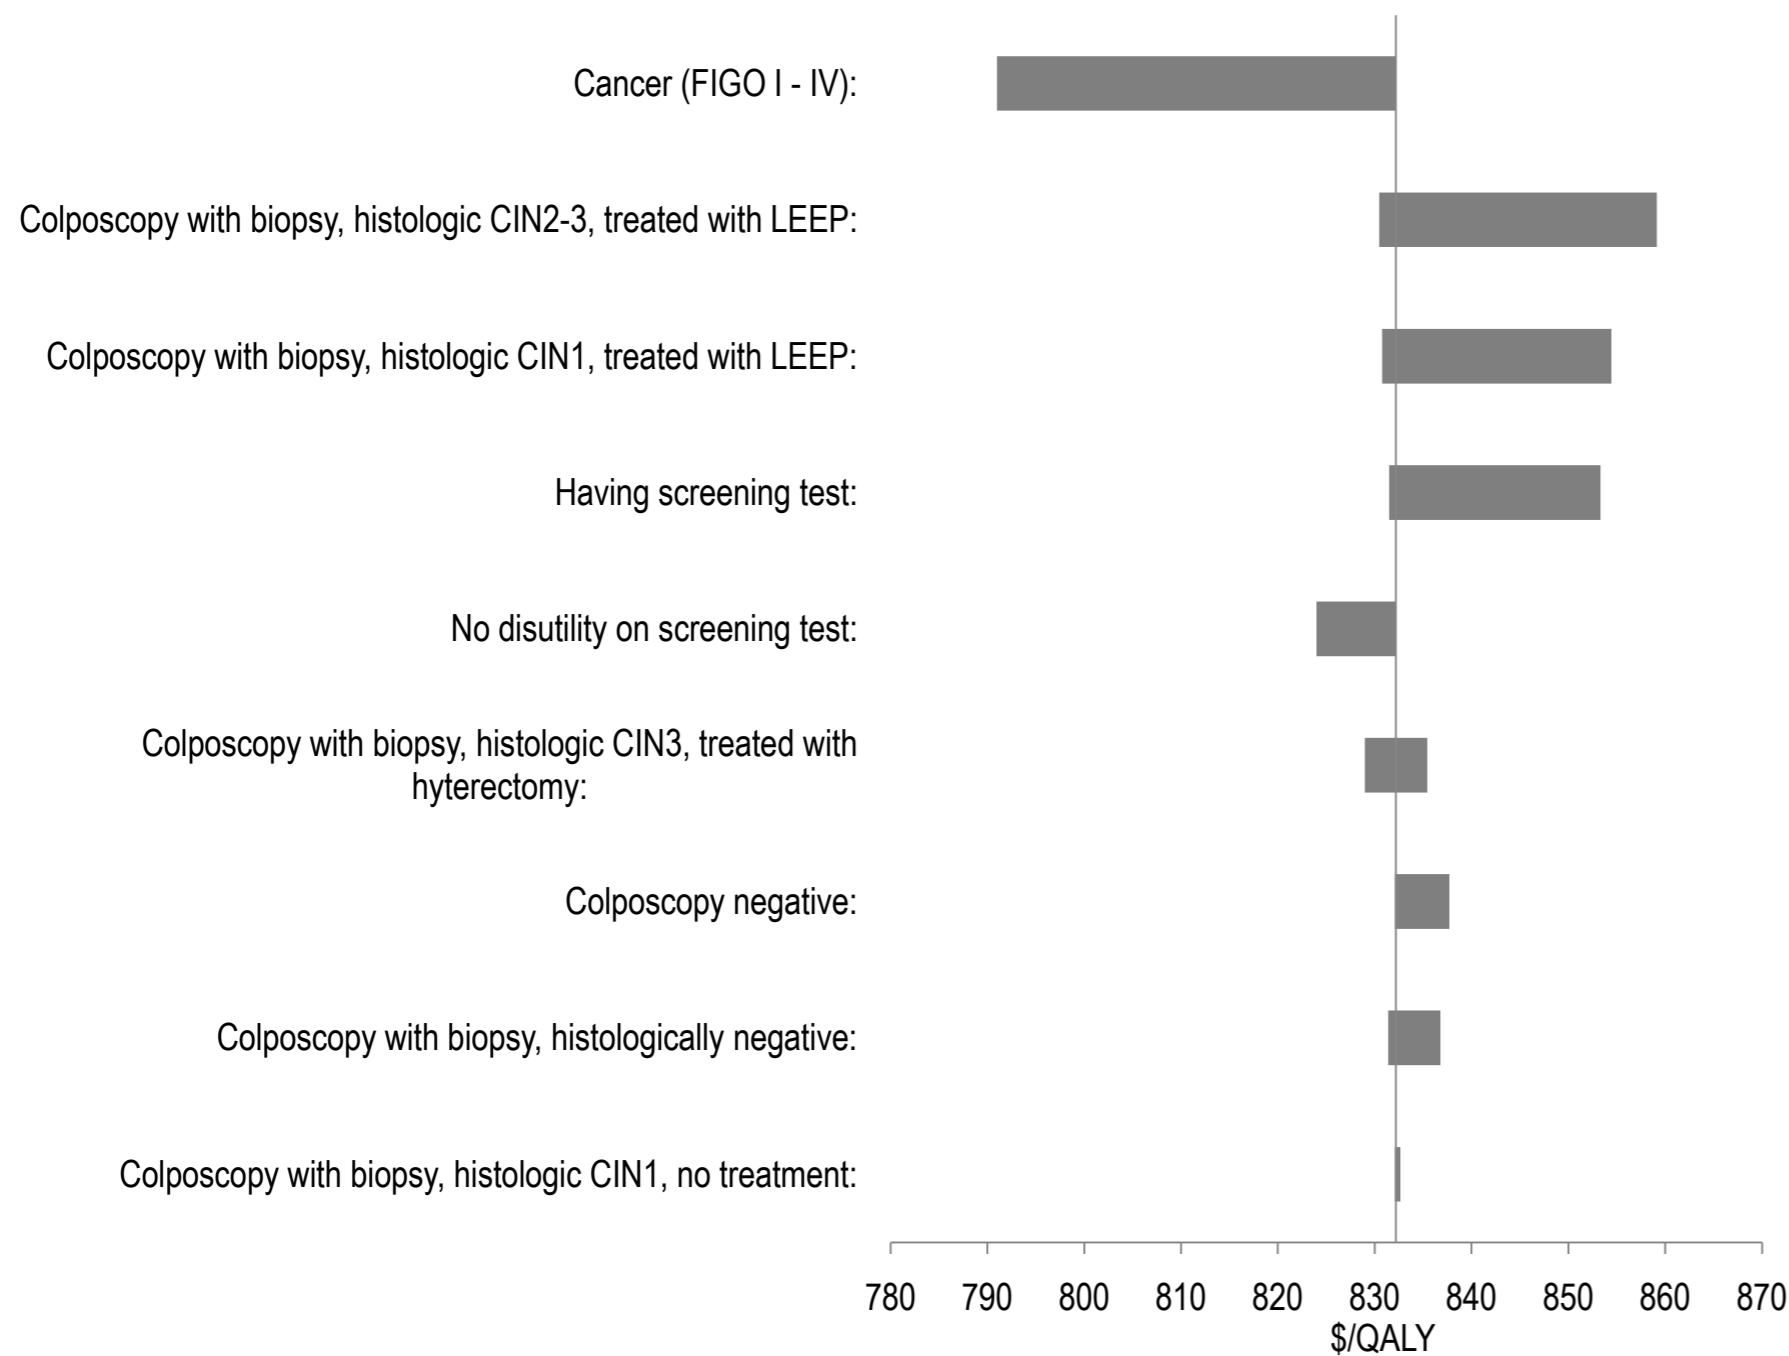

B. Routine screening with *careHPV@0.5pg/ml* at IARC-recommended screening intervals

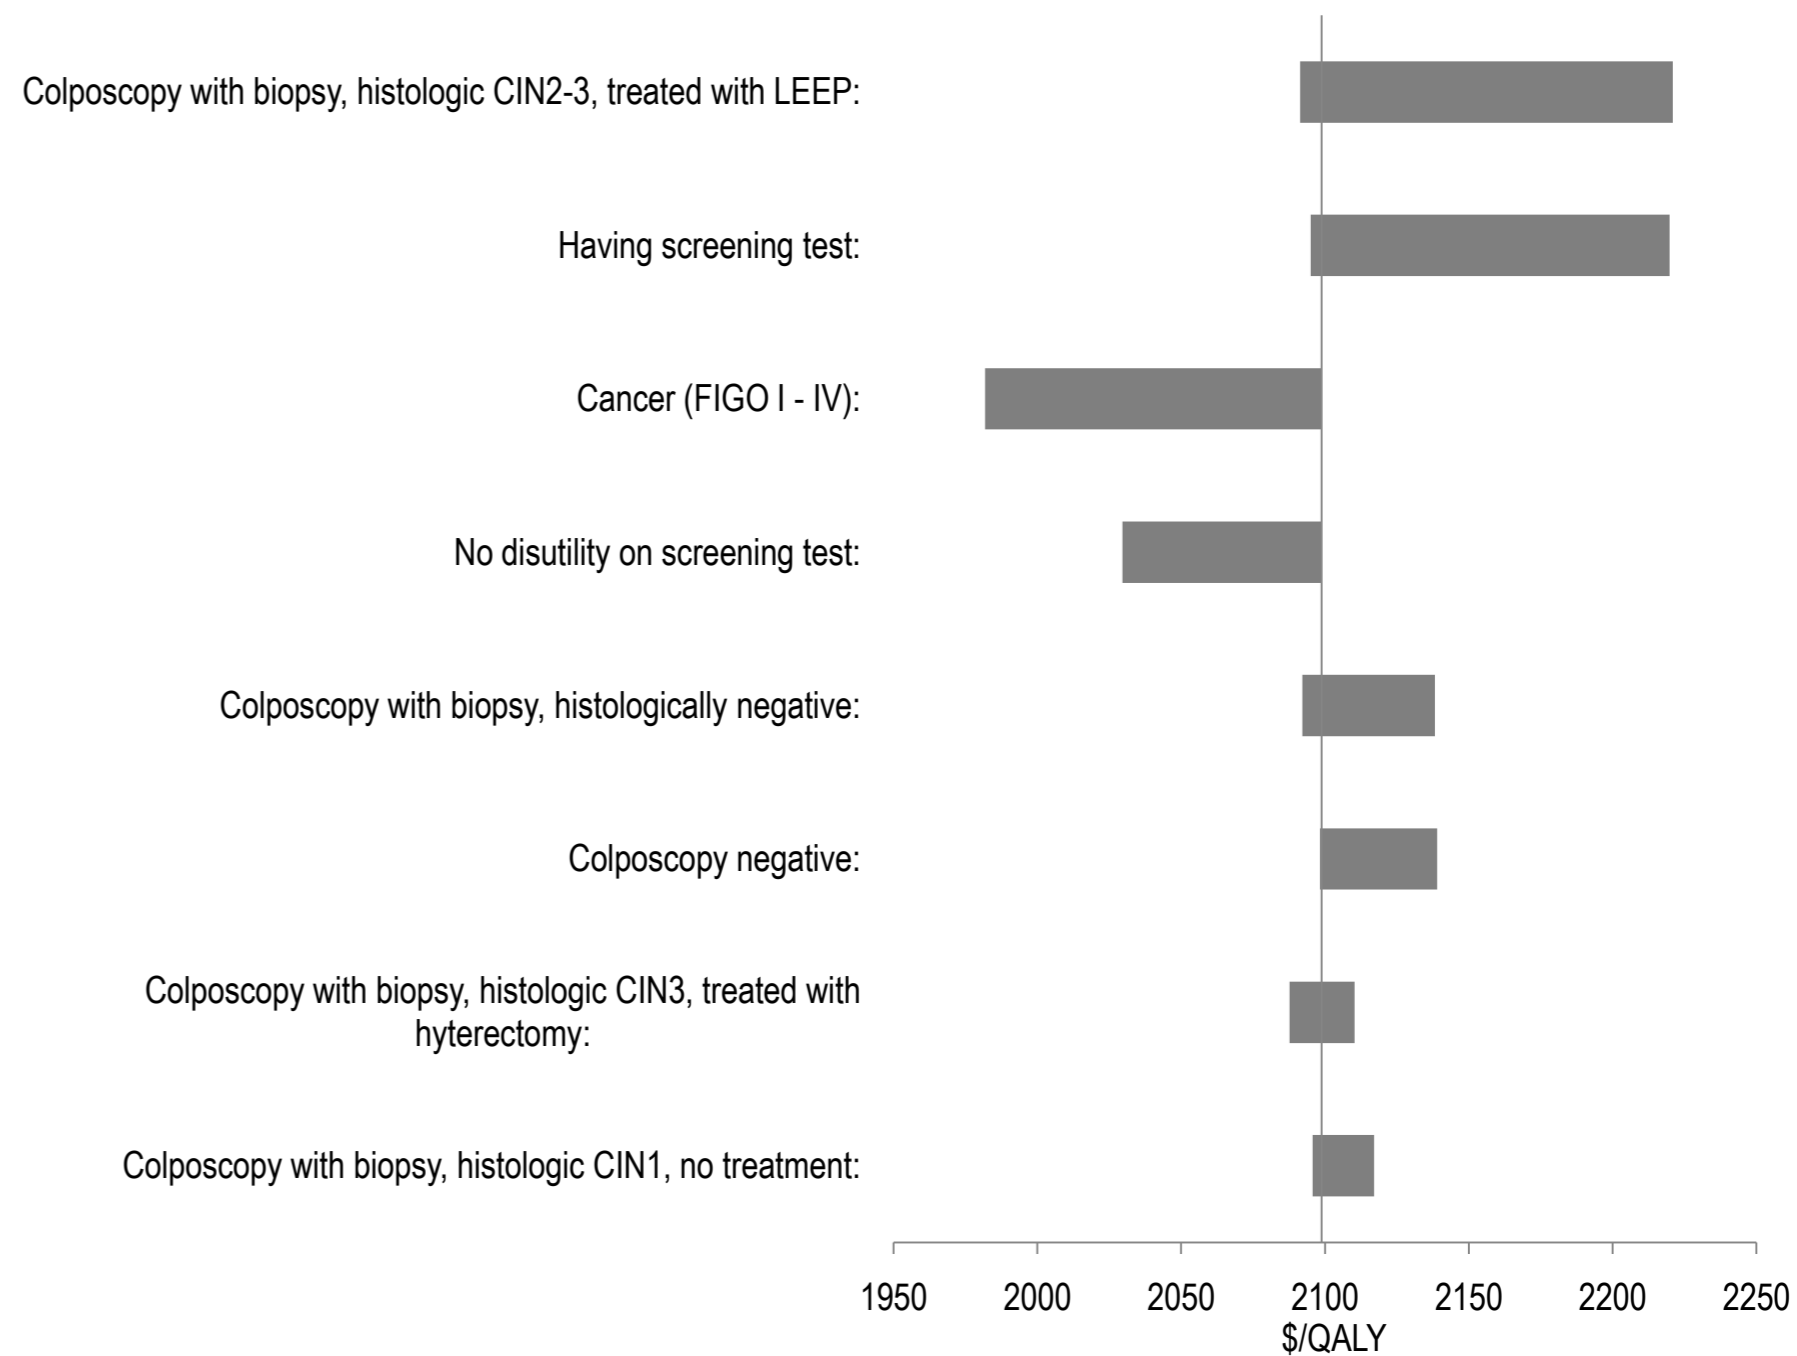

Supplement: MOESM7 [file 9461838]
